# Supplementary material for: Characterization of N-phenylmaleimide-terminated poly(ethylene glycol)s and their application to a tetra-arm poly(ethylene glycol) gel
Source: Royal Society of Chemistry journal article supplement (doi:10.1039/d0sm01658f), 2020-01-01
Supplement: d0sm01658f1.pdf [file d0sm01658f1.pdf]

## Supporting Information

### **Characterization of *N*-phenyl maleimide-terminated poly(ethylene glycol)s and their application to a tetra-arm poly(ethylene glycol) gels**

Rikito Takashima,<sup>a</sup> Masashi Ohira,<sup>b</sup> Hirogi Yokochi,<sup>a</sup> Daisuke Aoki,<sup>\*a,c</sup> Xiang Li,<sup>\*d</sup> and Hideyuki Otsuka<sup>\*a</sup>

(a) *Department of Chemical Science and Engineering, Tokyo Institute of Technology, 2-12-1 Ookayama, Meguro-ku, Tokyo 152-8550, Japan*

(b) *Department of Bioengineering, School of Engineering, The University of Tokyo, 7-3-1 Hongo, Bunkyo-ku, Tokyo, 113-8656, Japan.*

(c) *JST-PRESTO*

(d) *Institute for Solid State Physics, The University of Tokyo, 5-1-5 Kashiwanoha, Kashiwa, Chiba 277-8581, Japan.*

#### Corresponding Authors

\* D. Aoki. Email: [daoki@polymer.titech.ac.jp](mailto:daoki@polymer.titech.ac.jp)

\* X. Li. Email: [x.li@issp.u-tokyo.ac.jp](mailto:x.li@issp.u-tokyo.ac.jp)

\* H. Otsuka. Email: [otsuka@polymer.titech.ac.jp](mailto:otsuka@polymer.titech.ac.jp)

## Spectral data

### $^1\text{H}$ NMR spectra

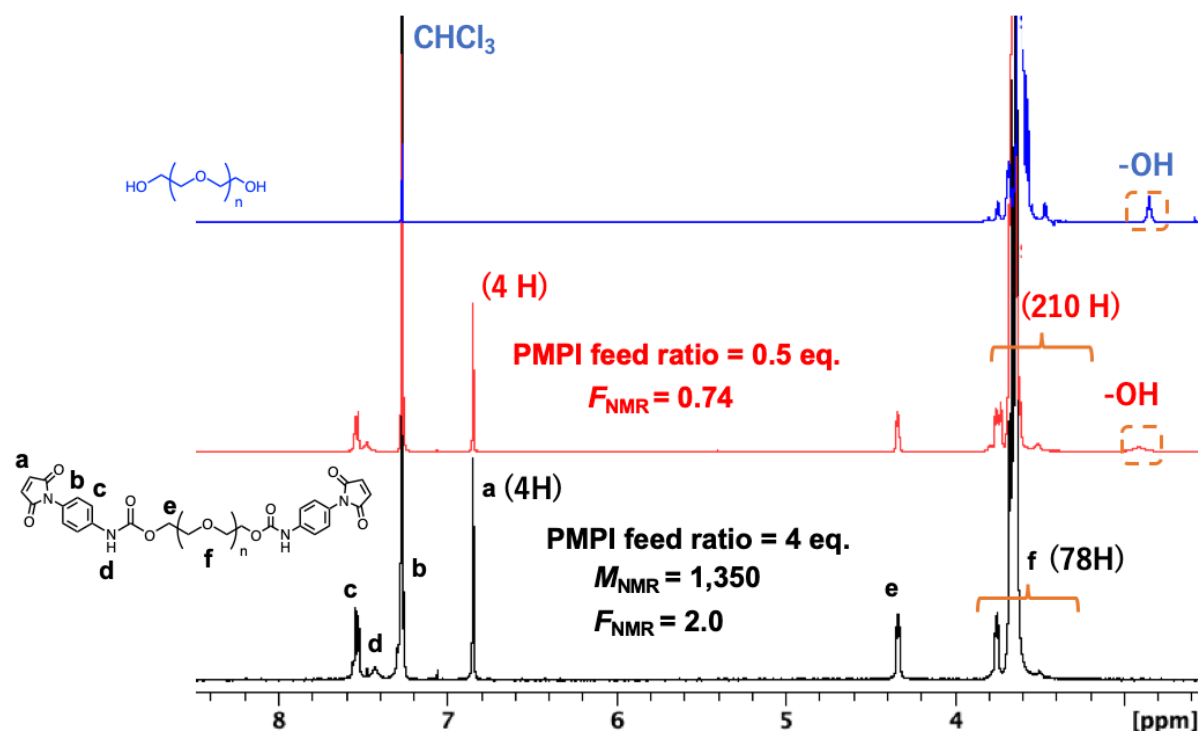

**Figure S1.**  $^1\text{H}$  NMR spectra of the products in Runs 1 (red) and 2 (black) in Table 1, and their precursor PEG ( $M_{n\text{ SEC}} 920$ ) (blue) (500 MHz, 25 °C,  $\text{CDCl}_3$ ).

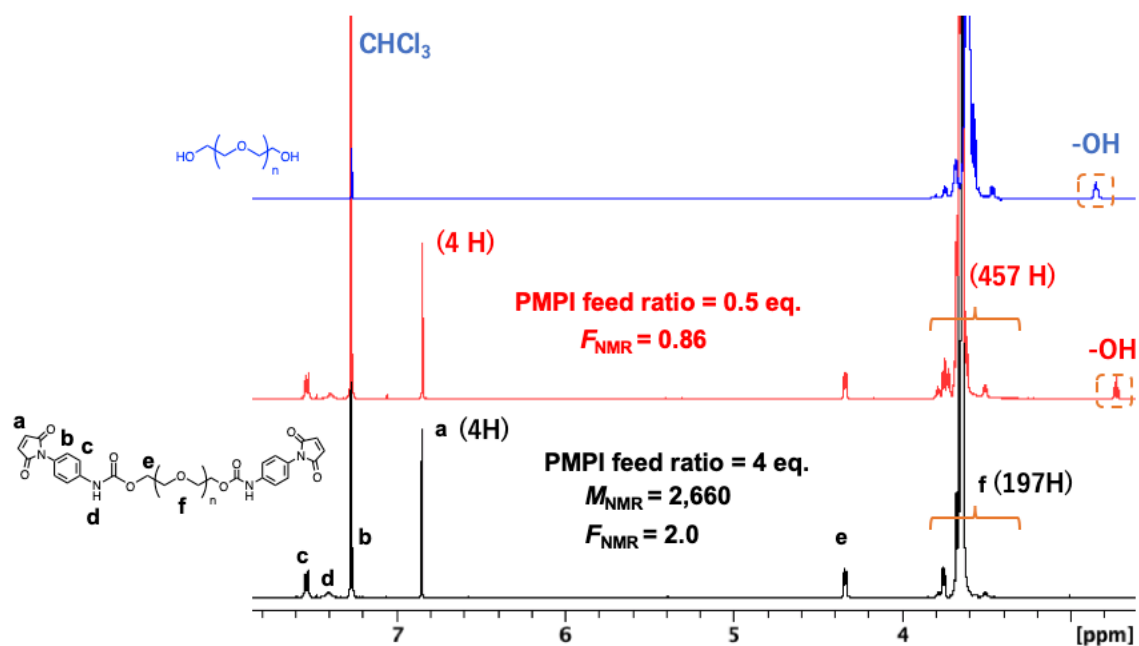

**Figure S2.**  $^1\text{H}$  NMR spectra of the products in Runs 3 (red) and 4 (black) in Table 1, and their precursor PEG ( $M_{n\text{ SEC}} 1,900$ ) (blue) (500 MHz, 25 °C,  $\text{CDCl}_3$ ).

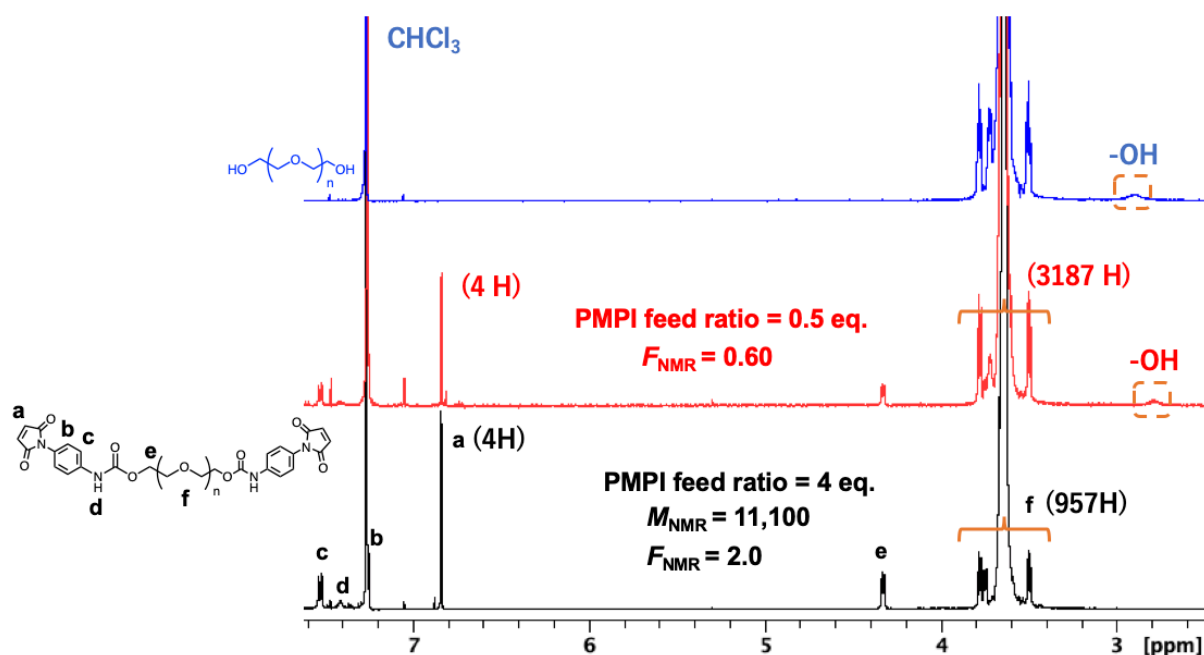

**Figure S3.**  $^1\text{H}$  NMR spectra of the products in Runs 5 (red) and 6 (black) in Table 1, and their precursor PEG10k ( $M_{n\text{ SEC}}$  7,900) (blue) (500 MHz, 25 °C,  $\text{CDCl}_3$ ).

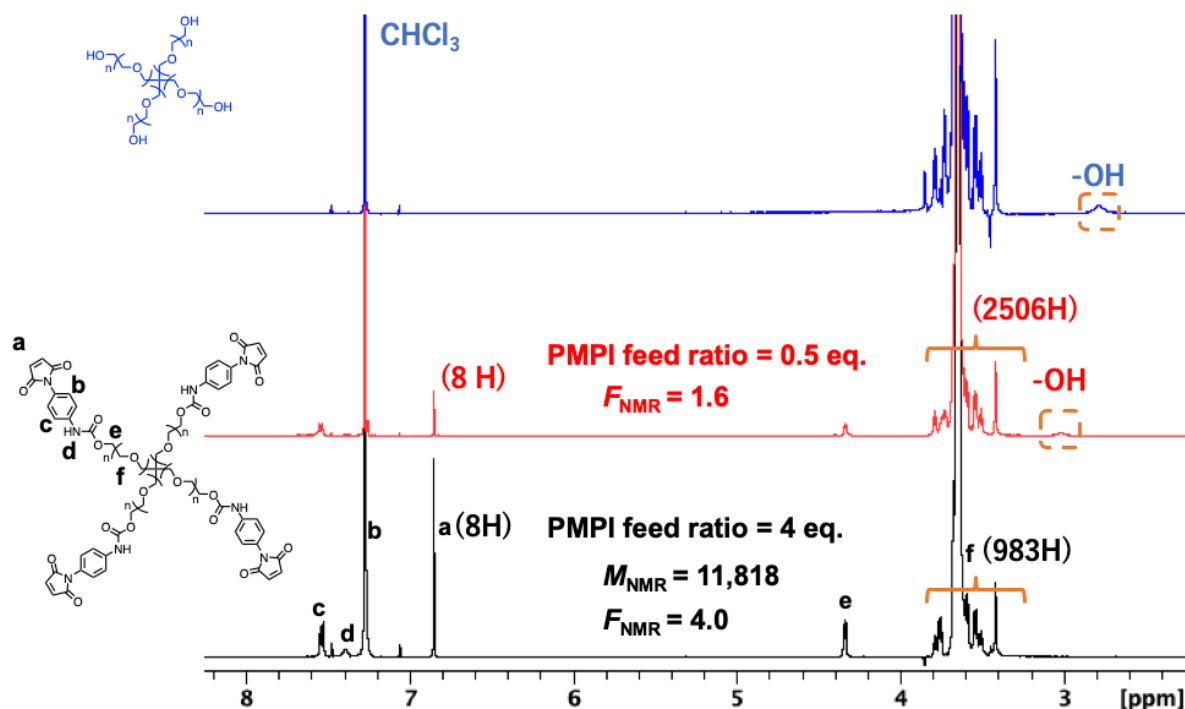

**Figure S4.**  $^1\text{H}$  NMR spectra of the products in Runs 7 (red) and 8 (black) in Table 1, and their precursor TetraPEG ( $M_{n\text{ SEC}}$  7,300) (blue) (500 MHz, 25 °C,  $\text{CDCl}_3$ ).

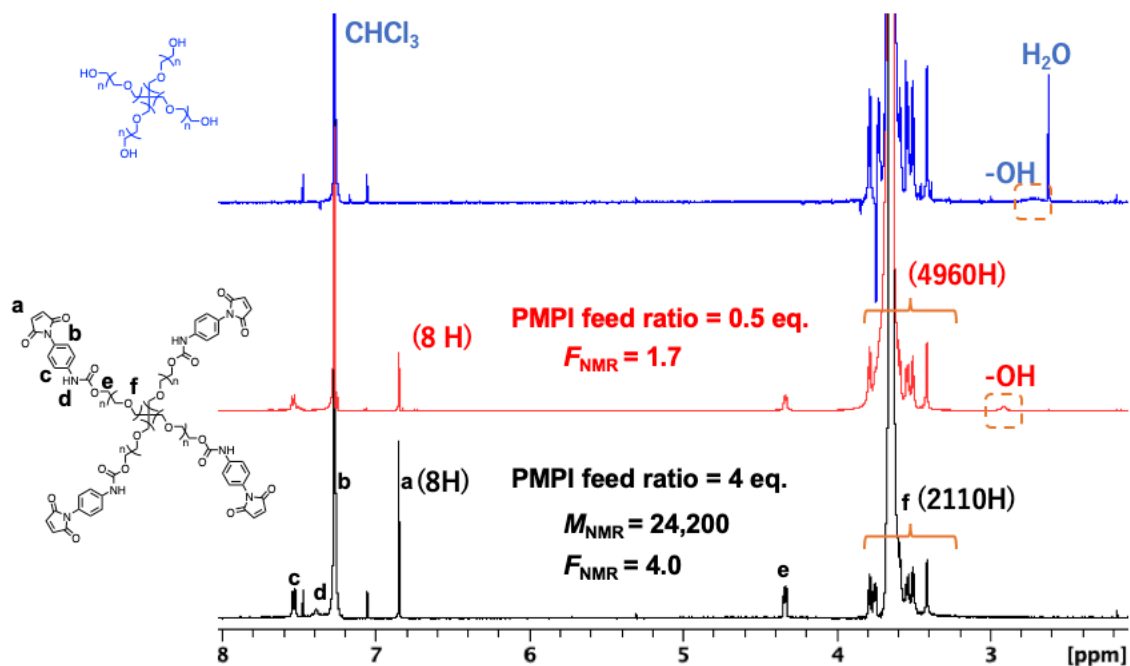

**Figure S5.**  $^1\text{H}$  NMR spectra of the products in Runs 9 (red) and 10 (black) in Table 1, and their precursor TetraPEG20k ( $M_{n\text{ SEC}}$  11,000) (blue) (500 MHz, 25 °C,  $\text{CDCl}_3$ ).

### $^{13}\text{C}$ NMR spectra

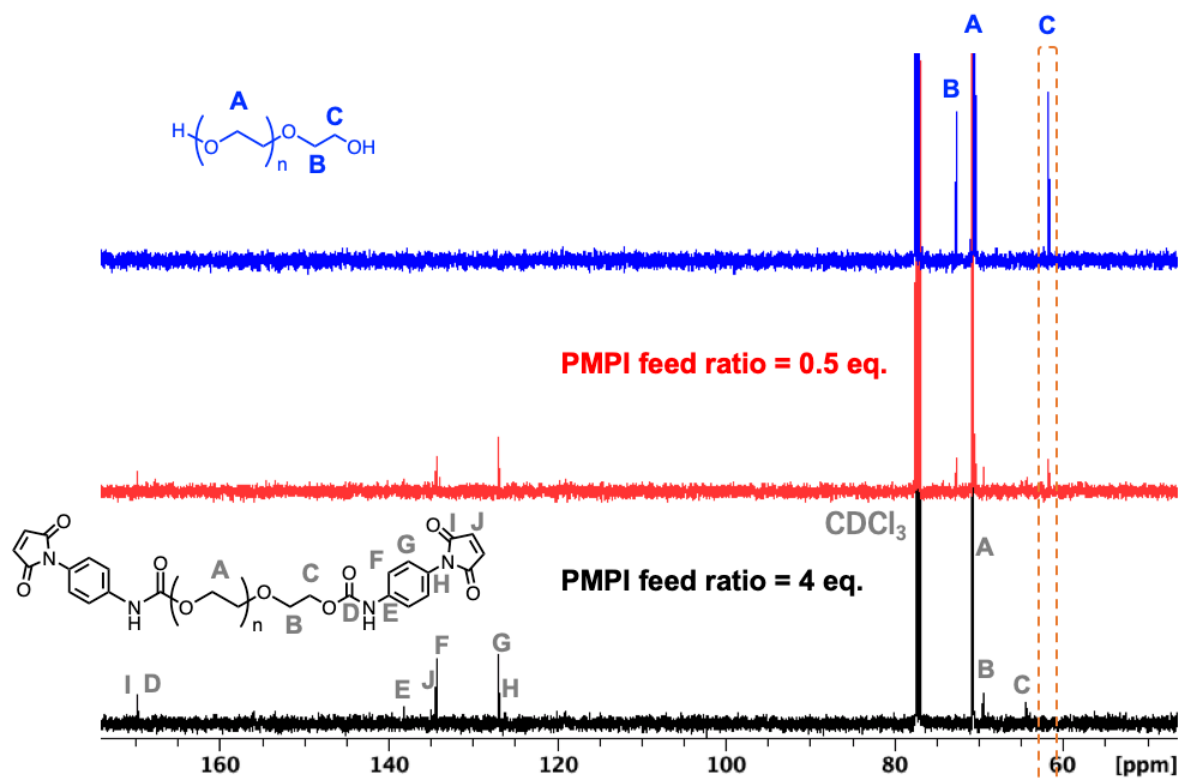

**Figure S6.**  $^{13}\text{C}$  NMR spectra of the products in Runs 3 (red) and 4 (black) in Table 1, and their precursor PEG ( $M_{n\text{ SEC}}$  1,900) (blue) (120 MHz, 25 °C,  $\text{CDCl}_3$ ).

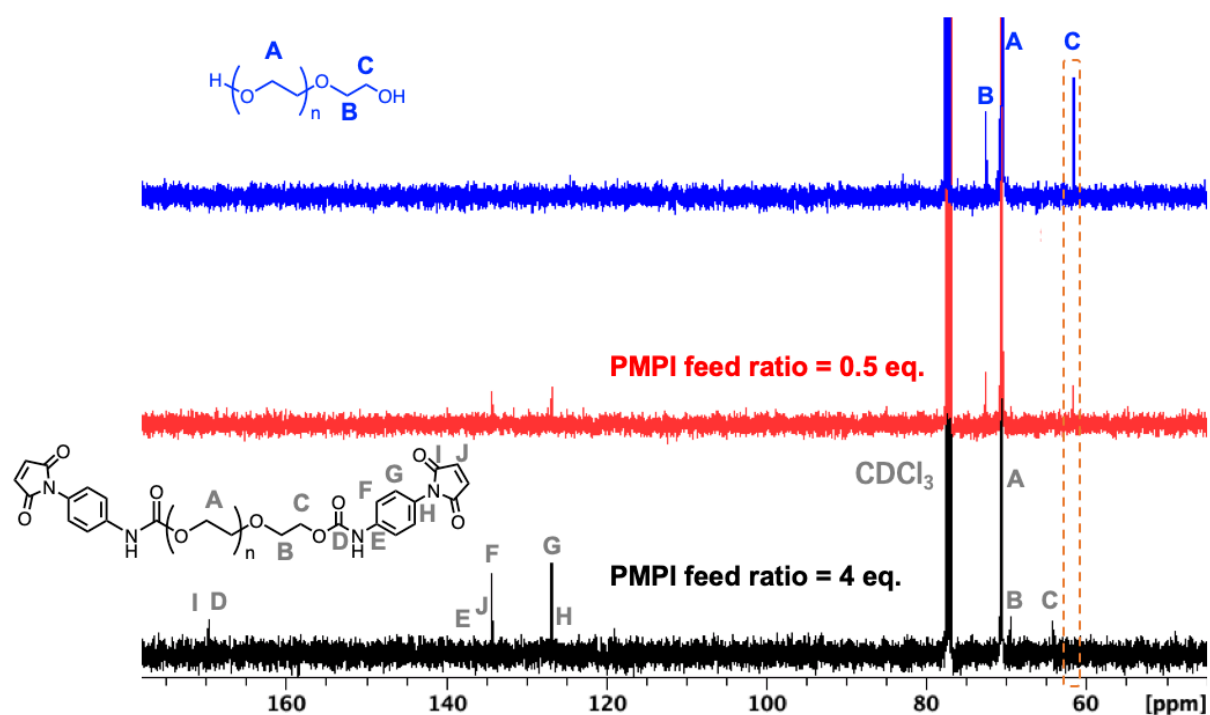

**Figure S7.**  $^{13}\text{C}$  NMR spectra of the products in Runs 5 (red) and 6 (black) in Table 1, and their precursor PEG10k ( $M_{n\text{ SEC}} 7,900$ ) (blue) (120 MHz, 25 °C,  $\text{CDCl}_3$ ).

## SEC curves

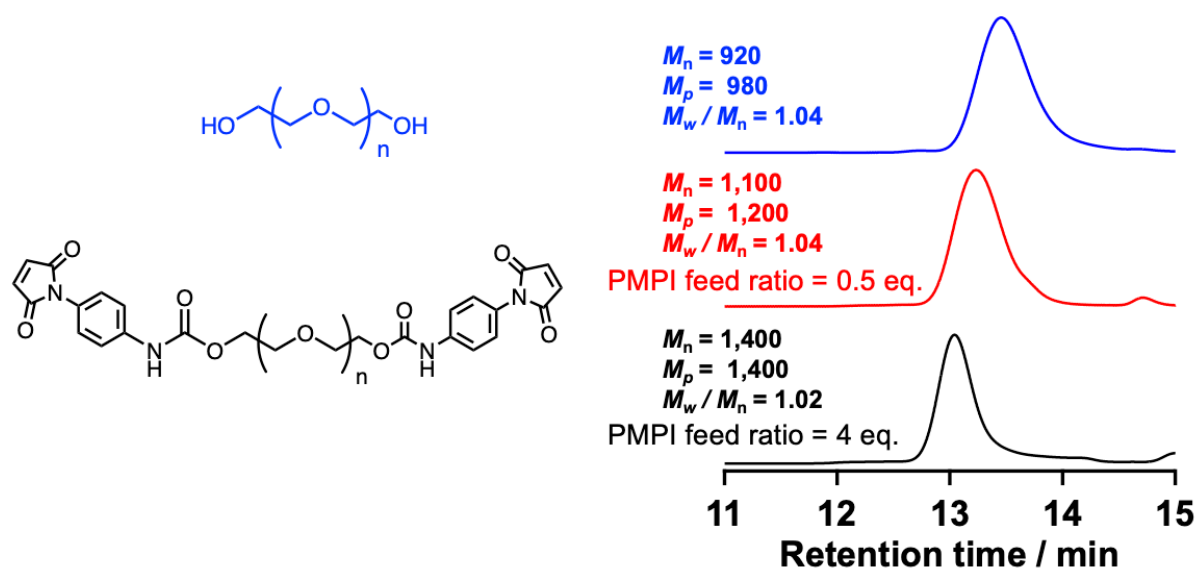

**Figure S8.** SEC charts of the products in Runs 1 (red) and 2 (black), and their precursor PEG1k (blue) (PS standard, eluent, THF; flow rate, 0.6 mL/min, detected by RI).

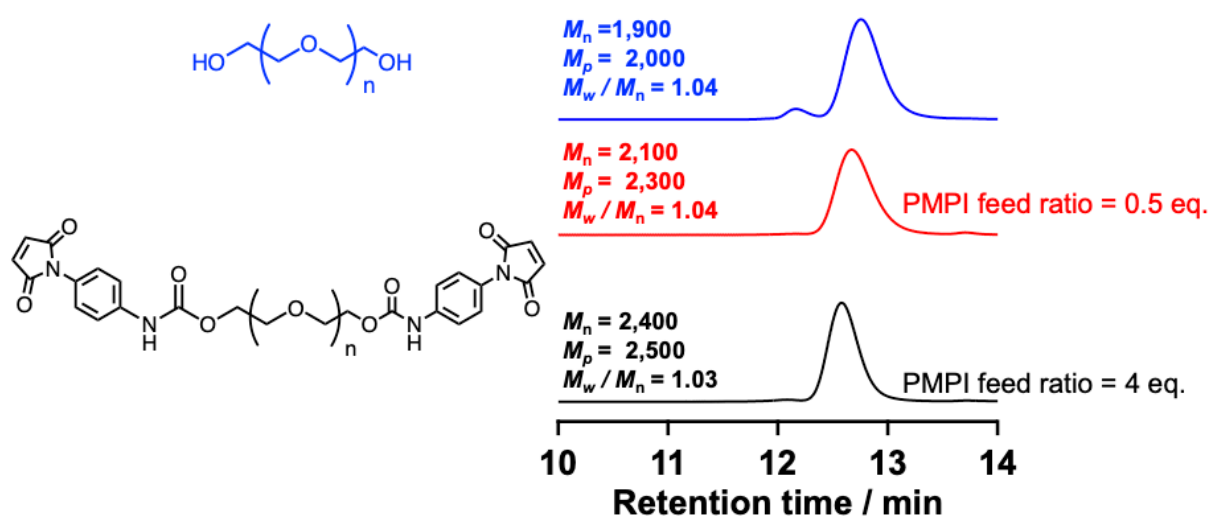

**Figure S9.** SEC charts of the products in Runs 3 (red) and 4 (black), and their precursor PEG2k (blue) (PS standard, eluent, THF; flow rate, 0.6 mL/min, detected by RI).

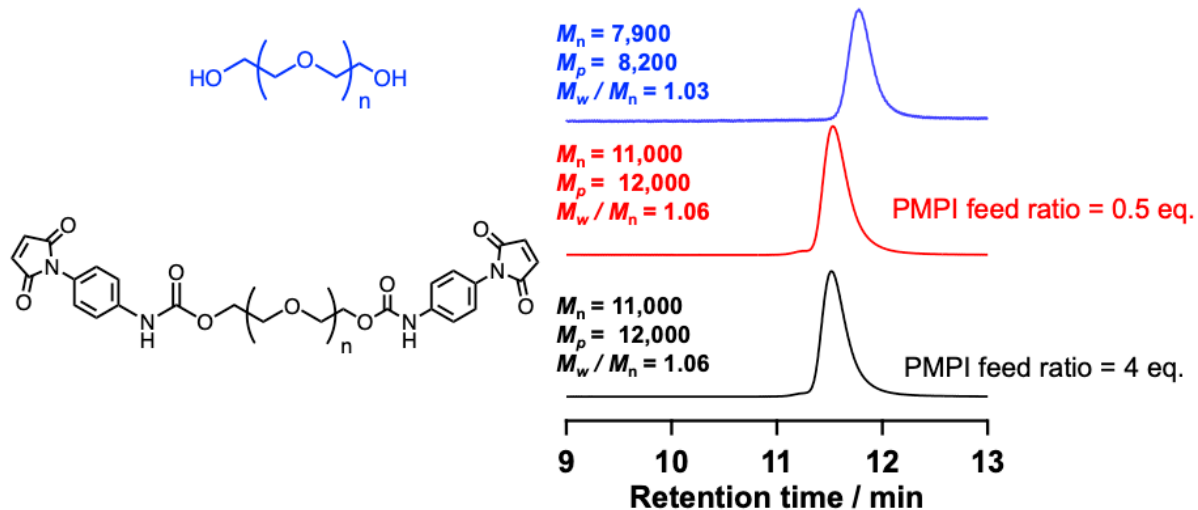

**Figure S10.** SEC charts of spectra of the products in Runs 5 (red) and 6 (black), and their precursor PEG10k (blue) (PS standard, eluent, THF; flow rate, 0.6 mL/min, detected by RI).

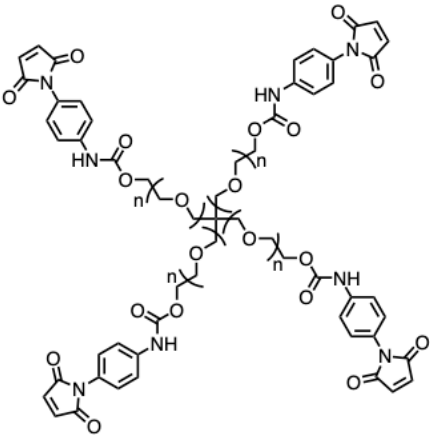

The image shows a chemical structure of a dendritic molecule. It features a central core with multiple branching points, each represented by a carbon atom bonded to two oxygen atoms. The terminal groups are hydroxyl groups (-OH). The structure is symmetrical and has a complex, branched architecture.

S - 7

1

HO-(CH<sub>2</sub>)<sub>4</sub>-O-(CH<sub>2</sub>)<sub>2</sub>-O-(CH<sub>2</sub>)<sub>4</sub>-OH

-OH PEG1k

2

HO-(CH<sub>2</sub>)<sub>4</sub>-O-(CH<sub>2</sub>)<sub>2</sub>-O-(CH<sub>2</sub>)<sub>4</sub>-O-CO-NH-C<sub>6</sub>H<sub>4</sub>-N-CO-C<sub>3</sub>H<sub>3</sub>O<sub>2</sub>

3

HO-(CH<sub>2</sub>)<sub>4</sub>-O-(CH<sub>2</sub>)<sub>2</sub>-O-(CH<sub>2</sub>)<sub>4</sub>-O-CO-NH-C<sub>6</sub>H<sub>4</sub>-N-CO-C<sub>3</sub>H<sub>3</sub>O<sub>2</sub>-O-CO-NH-C<sub>6</sub>H<sub>4</sub>-N-CO-C<sub>3</sub>H<sub>3</sub>O<sub>2</sub>-OH

Experimental value  
(Theoretical value)

44 Da

1053.30  
(1053.26)

1267.49  
(1267.29)

1481.41  
(1481.33)

m/z

[illegible]

S - 8





## HPLC measurements

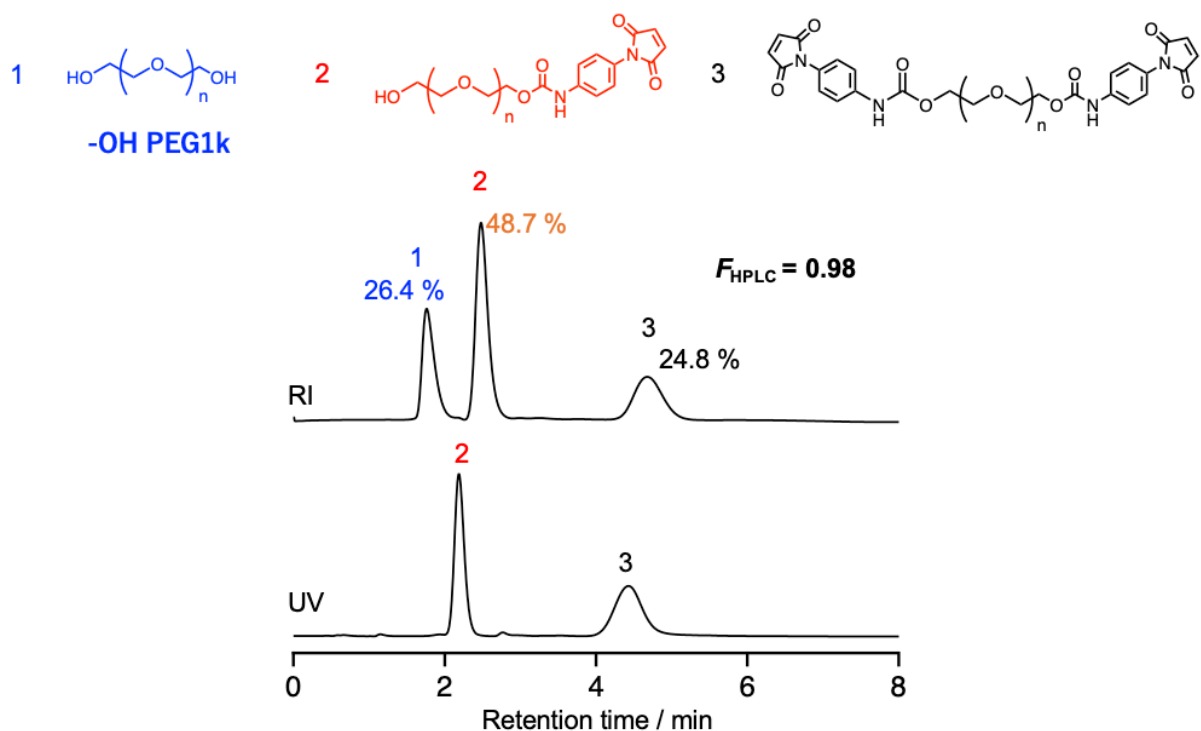

**Figure S17.** HPLC charts of the products in Run 1 in Table 1 (eluent, CH<sub>3</sub>CN / water = 45 / 55; flow rate, 1.0 mL/min, detected by UV and RI).

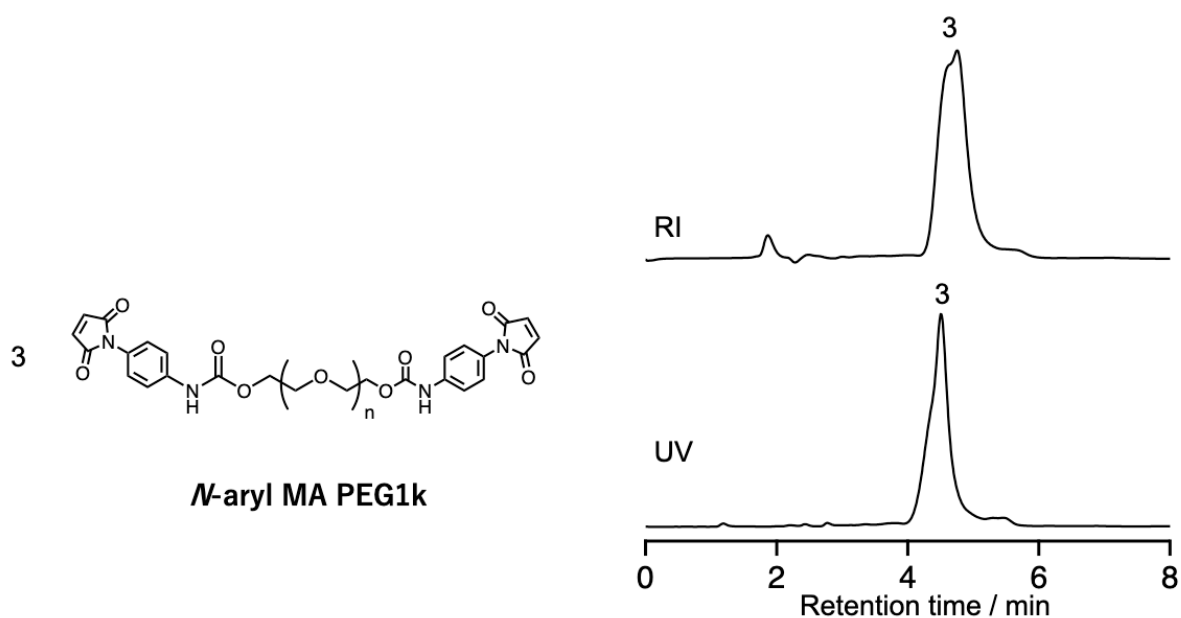

**Figure S18.** HPLC charts of the product in Run 2 in Table 1 (eluent, CH<sub>3</sub>CN / water = 45 / 55 flow rate, 1.0 mL/min, detected by UV and RI).

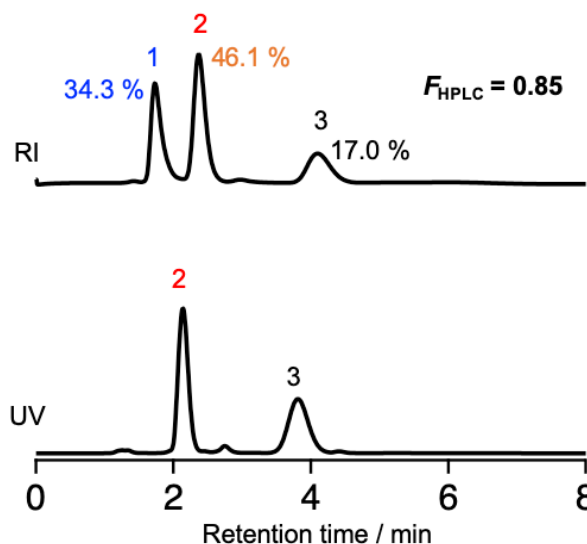

3



*N*-aryl MA PEG2k

RI

3

UV

3

0 2 4 6 8

Retention time / min

S -11

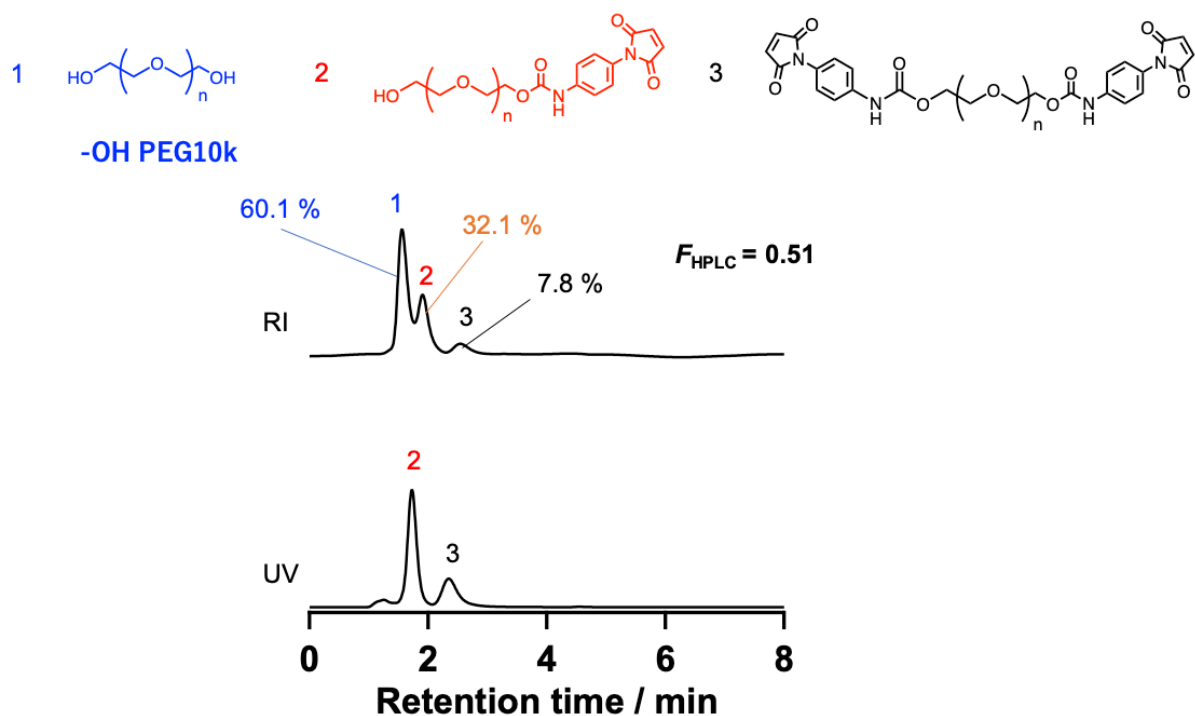

**Figure S21.** HPLC charts of the products in Run 5 in Table 1 (eluent, CH<sub>3</sub>CN / water = 45 / 55; flow rate, 1.0 mL/min, detected by UV and RI).

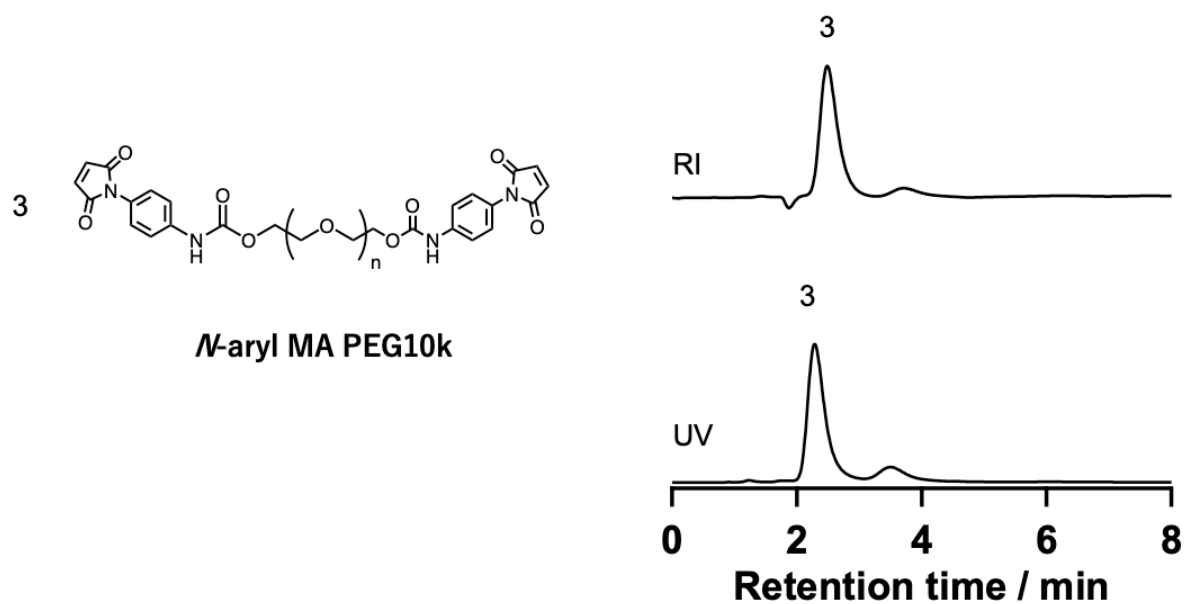

**Figure S22.** HPLC charts of the products in Run 6 in Table 1 (eluent, CH<sub>3</sub>CN / water = 45 / 55; flow rate, 1.0 mL/min, detected by UV and RI).

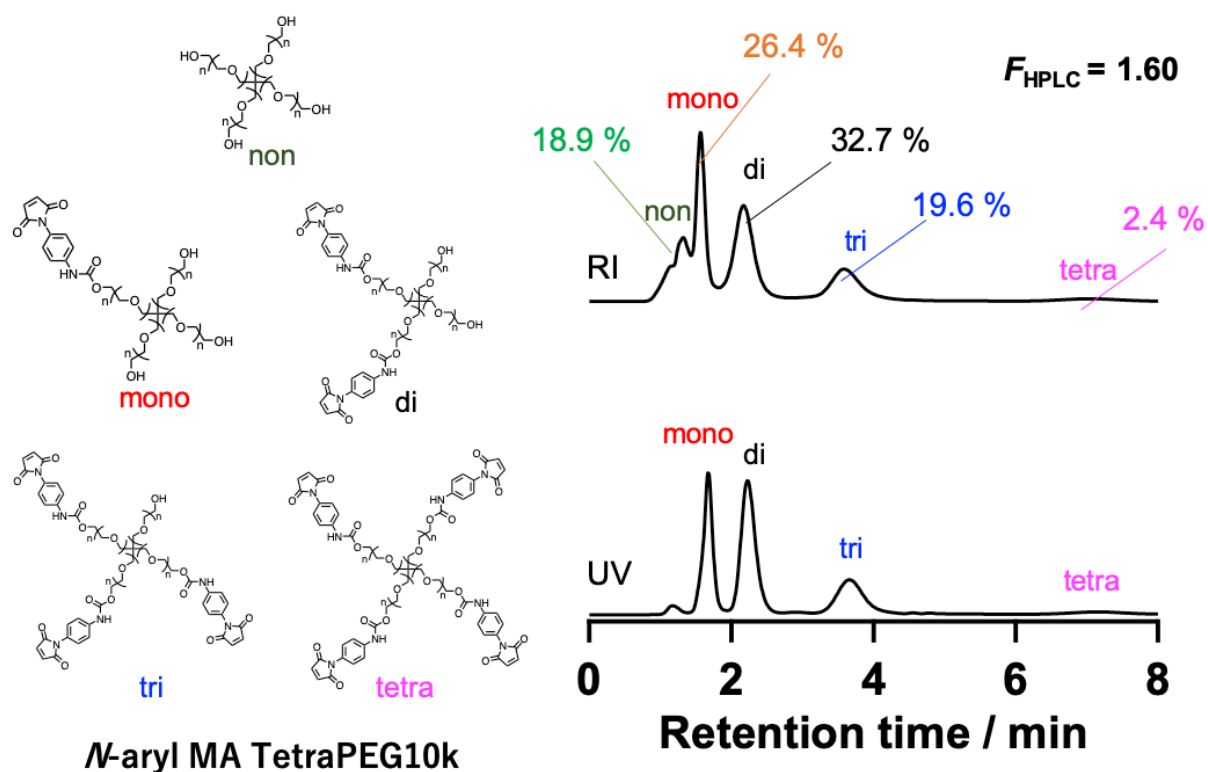

**Figure S23.** HPLC charts of the products in Run 7 in Table 1 (eluent, CH<sub>3</sub>CN / water = 45 / 55; flow rate, 1.0 mL/min, detected by UV and RI).

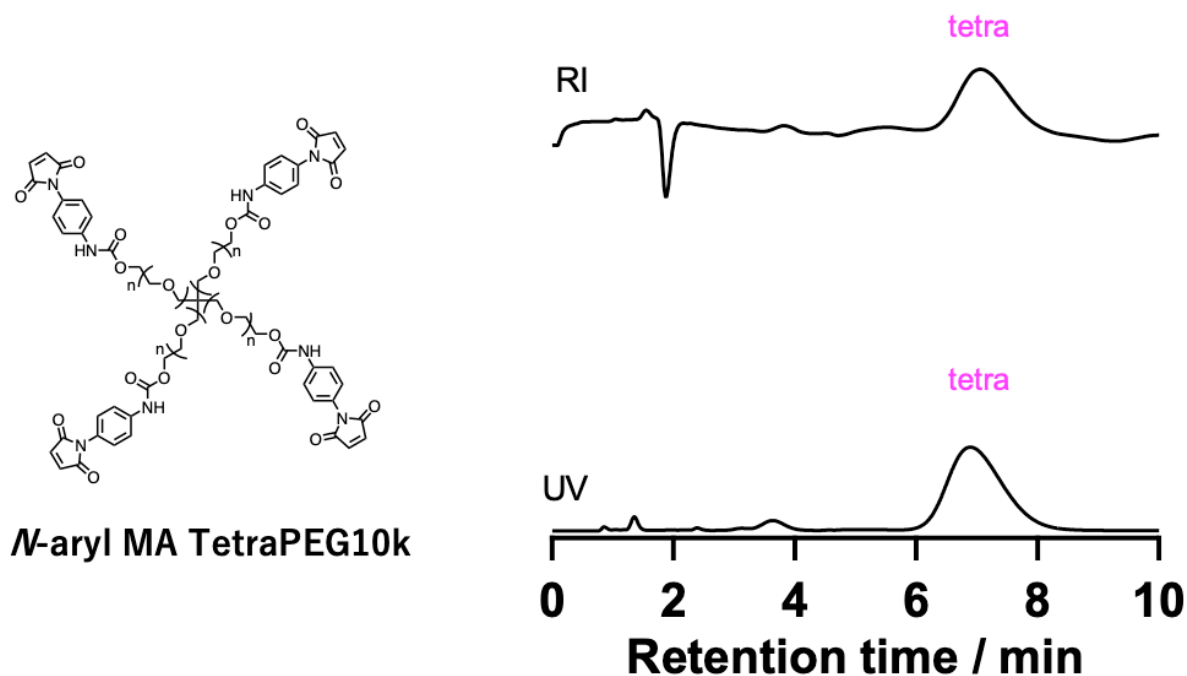

**Figure S24.** HPLC charts of the product in Run 8 in Table 1 (eluent, CH<sub>3</sub>CN / water = 45 / 55; flow rate, 1.0 mL/min, detected by UV and RI).

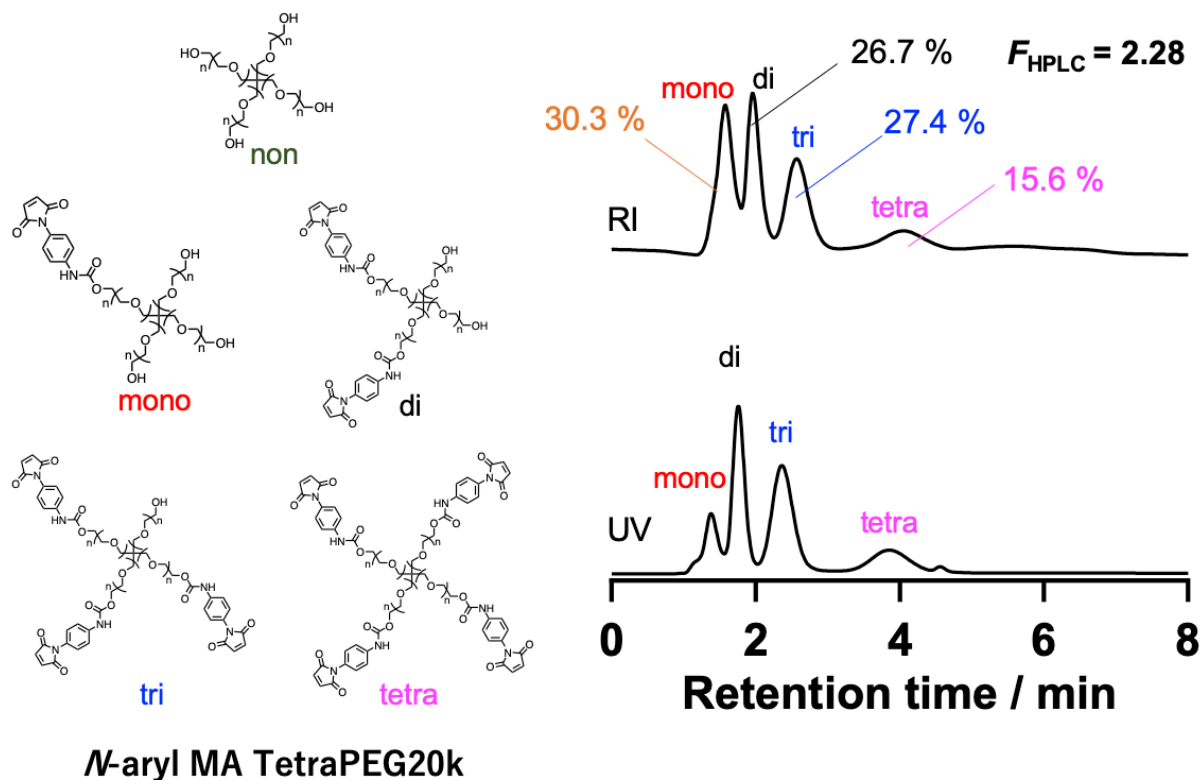

**Figure S25.** HPLC charts of the products in Run 9 in Table 1 (eluent, CH<sub>3</sub>CN / water = 45 / 55; flow rate, 1.0 mL/min, detected by UV and RI).

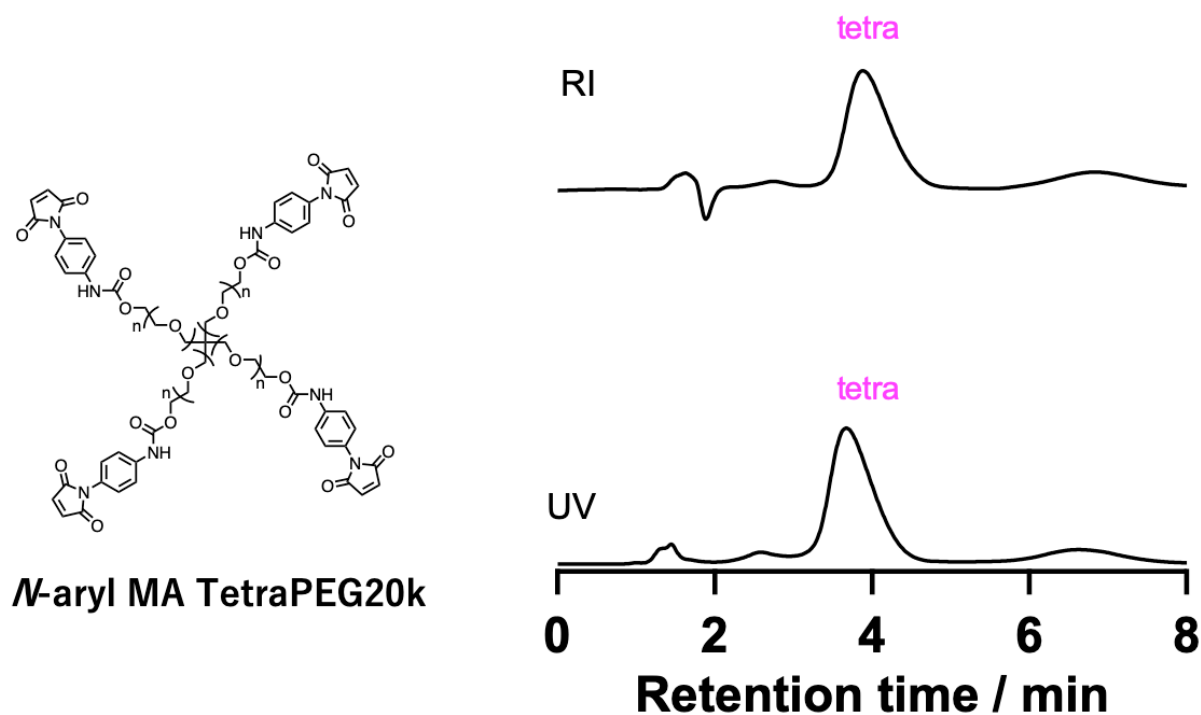

**Figure S26.** HPLC charts of the product in Run 10 in Table 1 (eluent, CH<sub>3</sub>CN / water = 45 / 55; flow rate, 1.0 mL/min, detected by UV and RI).

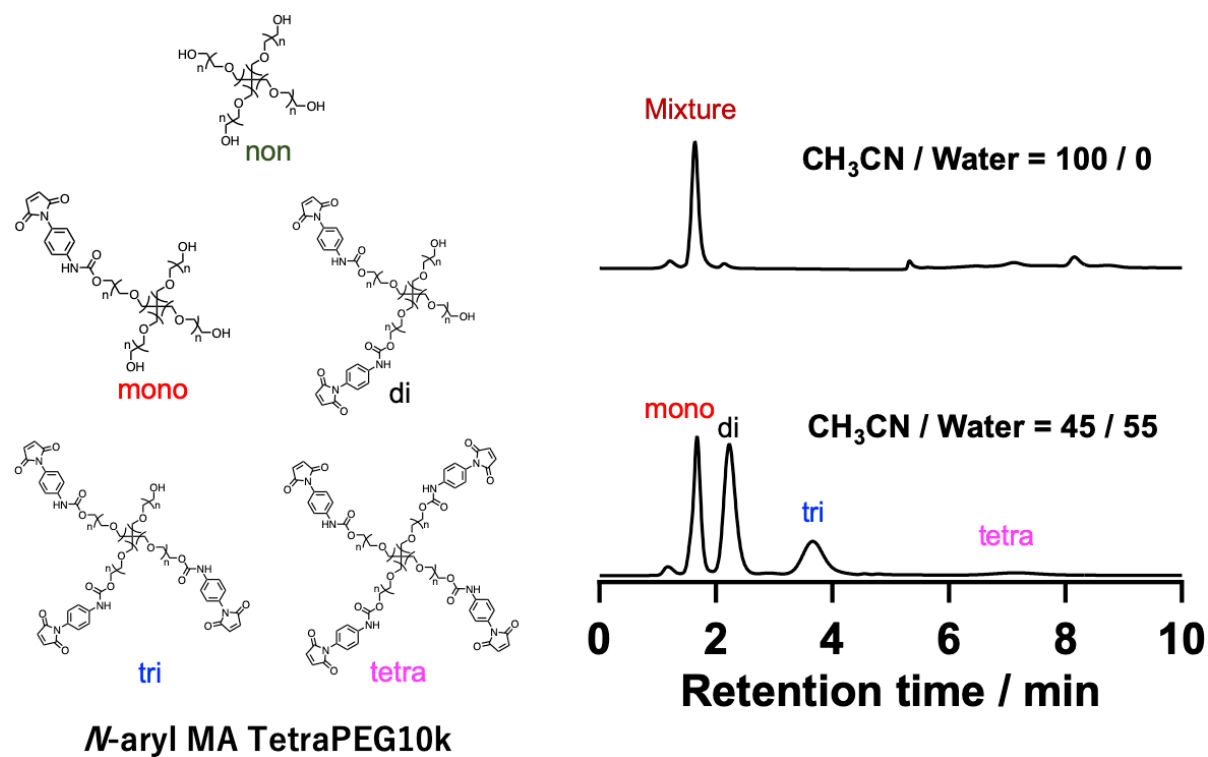

**Figure S27.** Effect of solvent composition in the dissolved sample. HPLC profiles of modified PEG prepared by CH<sub>3</sub>CN or CH<sub>3</sub>CN / water = 45 / 55 (HPLC eluent, CH<sub>3</sub>CN / water = 45 / 55 vol%; flow rate, 1.0 mL/min on C18 column at 30 °C detected by UV).

### Reaction tracking

PMPI (120 mg, 560  $\mu\text{mol}$ , 4.0 equivalents toward -OH groups) and TetraPEG (700 g, 35  $\mu\text{mol}$ ,  $M_n$  = ca. 20 000) were added to a round-bottomed flask. DCM (28 mL) and 2 drops of DBTDL were added under inert atmosphere.

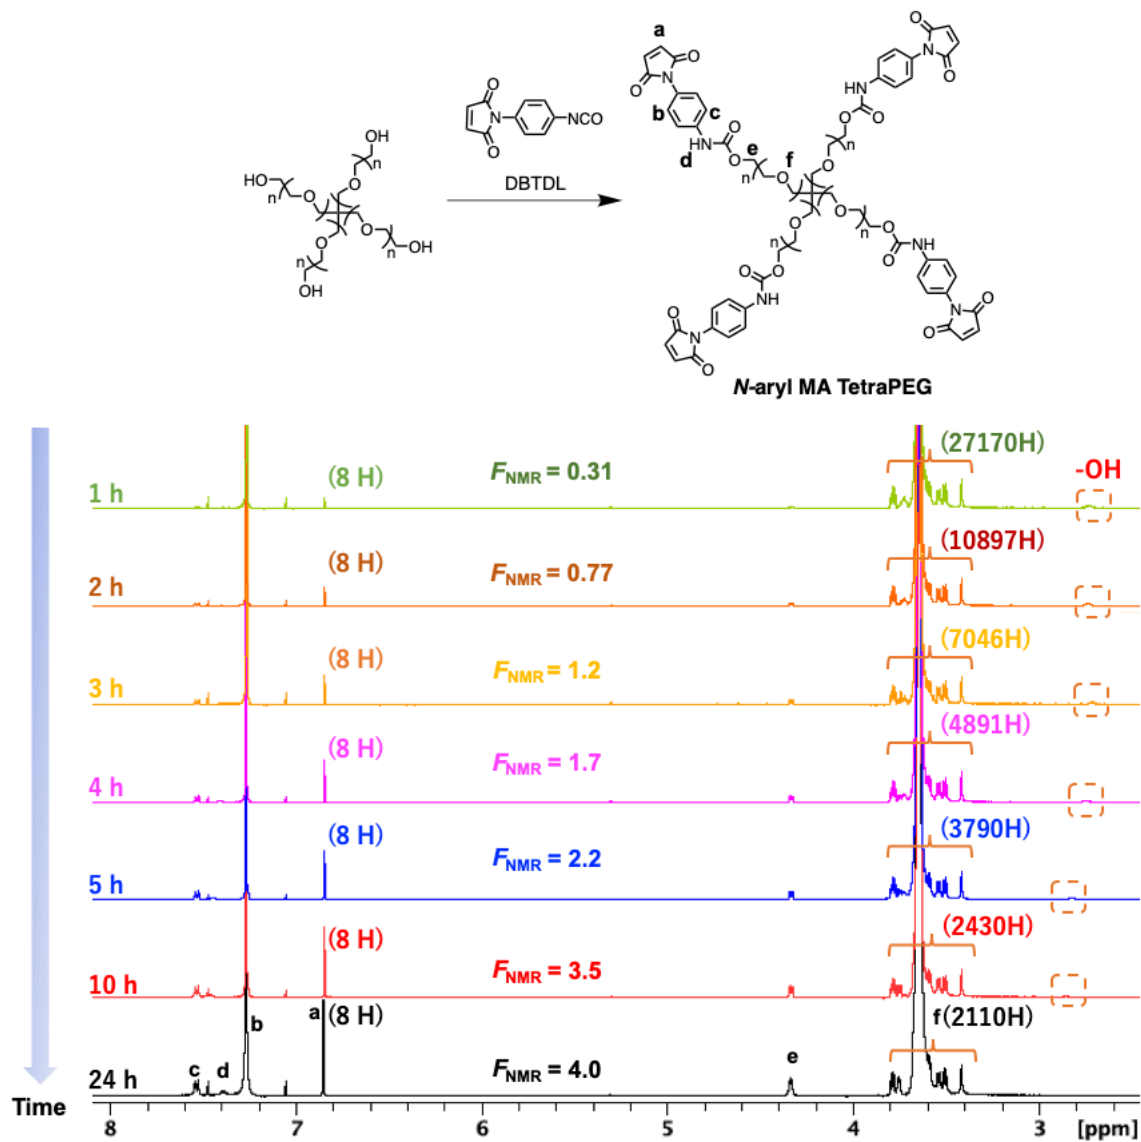

**Figure S28.** Changes in  $^1\text{H}$  NMR spectra of the products in Run 10 in Table 1 (500 MHz, 25  $^{\circ}\text{C}$ ,  $\text{CDCl}_3$ ).



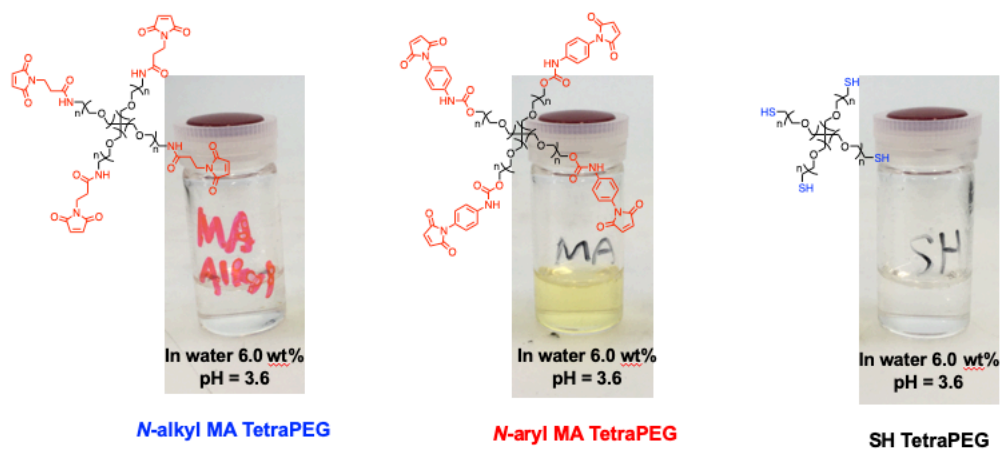

**Figure S29.** UV-vis spectra of various functional TetraPEGs at 6wt% before gelation experiment (in pH 3.6 buffer).

**Table S1.** pH dependence of gelation time\*.

| pH  | <i>N</i> -aryl MA | <i>N</i> -alkyl MA |
|-----|-------------------|--------------------|
| 3.0 | 1000 sec          | 5000 sec           |
| 3.6 | 200 sec           | 1100 sec           |

\*Gelation time was estimated by viscoelastic properties.
